# Supplementary material for: Solution-processed inorganic copper(i) thiocyanate (CuSCN) hole transporting layers for efficient p–i–n perovskite solar cells
Source: Royal Society of Chemistry journal article supplement (doi:10.1039/c5ta04028k), 2015-01-01
Supplement: c5ta04028k1.pdf [file c5ta04028k1.pdf]

Supporting information

## Solution-Processed Inorganic Copper(I) Thiocyanate (CuSCN) Hole Transporting Layer for Efficient p-i-n Perovskite Solar Cells

K. Zhao, R. Munir, B. Yan, Y. Yang, T. Kim, A. Amassian

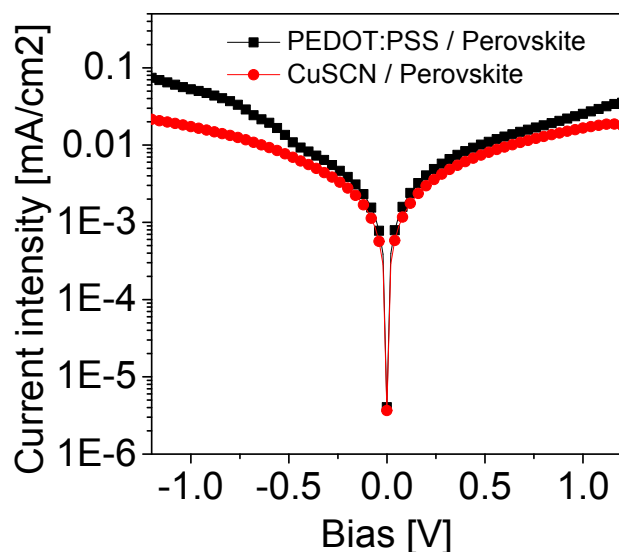

**Figure S1.**  $J-V$  curves of the optimized perovskite solar cell with CuSCN and PEDOT:PSS under dark condition.

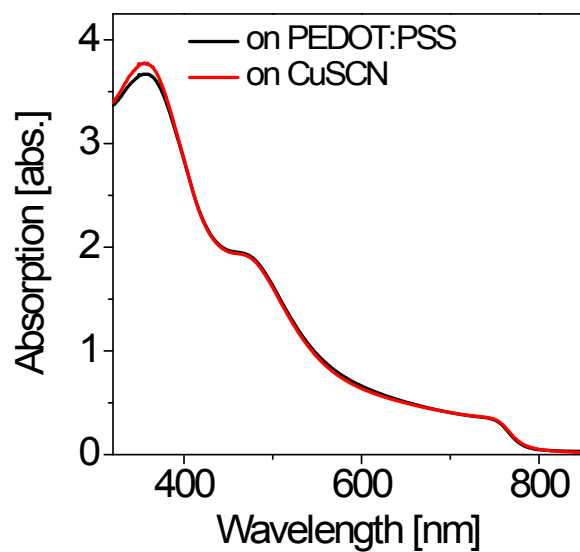

**Figure S2.** UV-Vis absorption spectra of perovskite film on PEDOT:PSS and CuSCN HTLs.

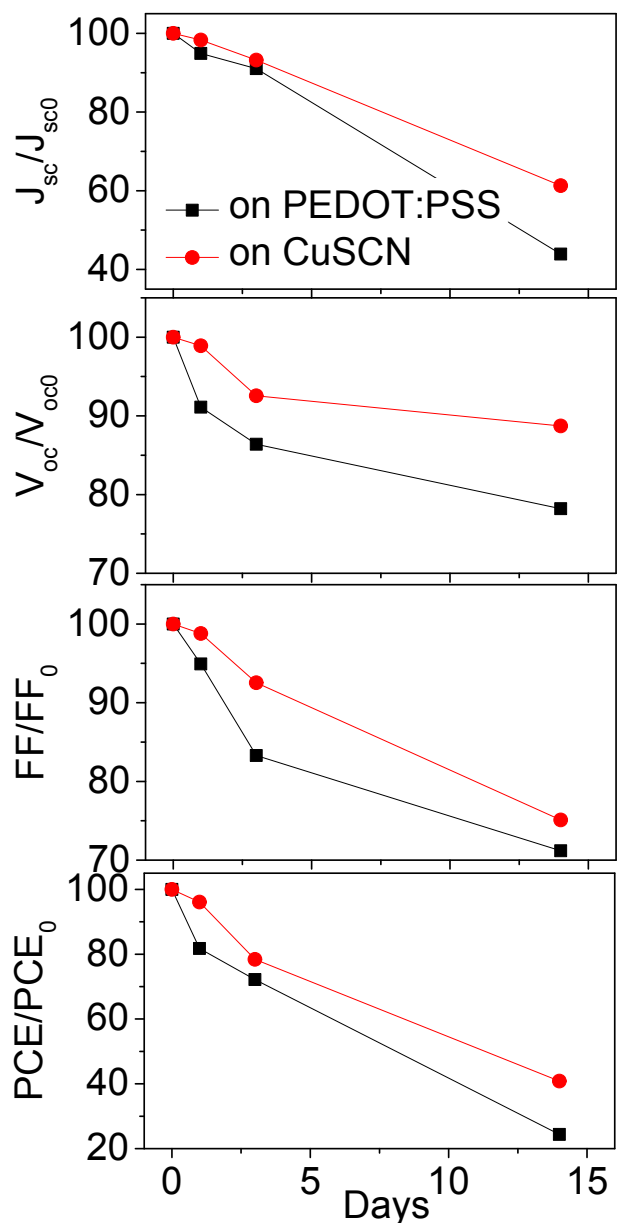

**Figure S3.** The lifetime of non-encapsulated solar cells based on PEDOT:PSS and CuSCN HTLs after being kept in  $N_2$  environment.
